# Supplementary material
Source: Springer Nature journal article supplement (https://www.springermedizin.de/resource/supplementary/12885_2012_3827_MOESM1_ESM.pdf/9464534)

**(a)**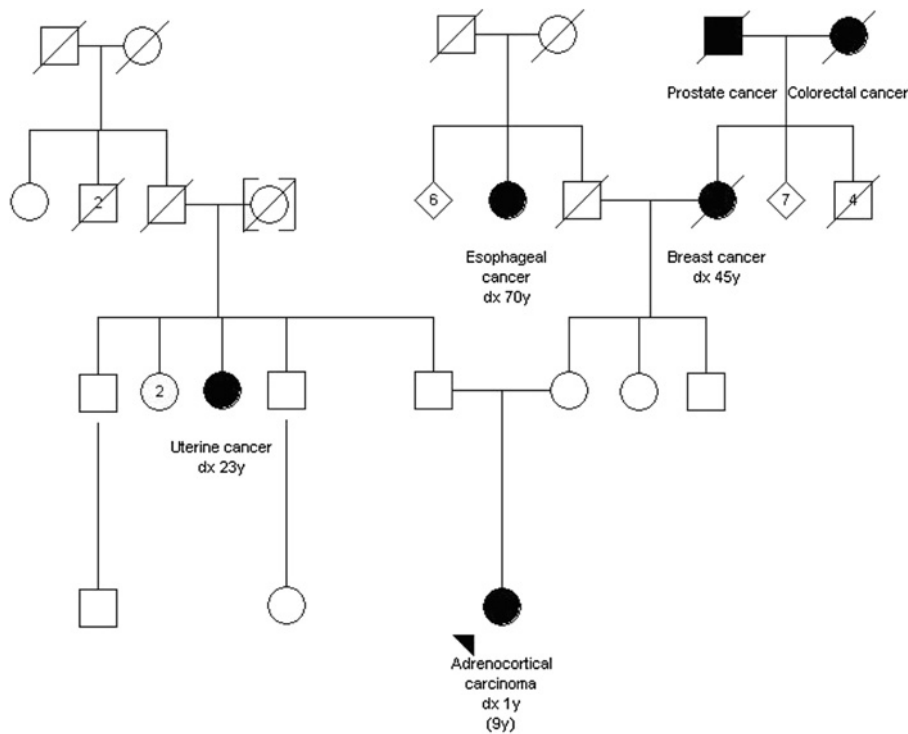**(b)**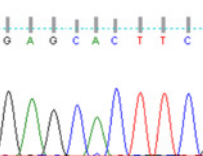**(c)**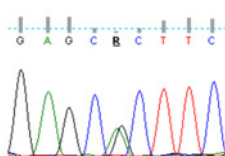**(d)**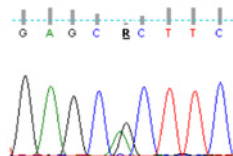

Supplement: MOESM1 [file 9464534]
